# Supplementary material for: Supporting decisions about genomic newborn screening at scale in the digital age: the BabyScreen+ study
Source: Research Square preprint supplement (doi:10.21203/rs.3.rs-7389522/v1), 2025-09-09
Supplement: Supplementary file 1 [file 32fed1073eb42f9a0b67853e.pdf]

## **Supplementary Appendix**

### **Supporting parental decisions about genomic newborn screening at scale in the digital age: the BabyScreen+ study**

#### **Table of Contents**

|                                                                                                                                                     |   |
|-----------------------------------------------------------------------------------------------------------------------------------------------------|---|
| Supplementary Table 1. Demographic characteristics associated with not proceeding with genomic newborn screening: Logistic regression analysis..... | 2 |
|-----------------------------------------------------------------------------------------------------------------------------------------------------|---|

**Supplementary Table 1. Demographic characteristics associated with not proceeding with genomic newborn screening: Logistic regression analysis**

|                                                                    | Proceeded with gNBS<br>(n=987) | Did not proceed with gNBS <sup>a</sup><br>(n=61) | Total<br>(n=1048) | Unadjusted odds ratio<br>OR (CI95%) | Adjusted odds ratio*<br>OR (CI95%) |
|--------------------------------------------------------------------|--------------------------------|--------------------------------------------------|-------------------|-------------------------------------|------------------------------------|
| <b>Age</b>                                                         |                                |                                                  |                   |                                     |                                    |
| Under 30                                                           | 137                            | 21                                               | 158               | 1                                   | 1                                  |
| 30 and above                                                       | 850                            | 40                                               | 890               | 3.26 (1.86-5.69)*                   | 3.30 (1.78-6.11)*                  |
| <b>Number of children</b>                                          |                                |                                                  |                   |                                     |                                    |
| 0                                                                  | 536                            | 25                                               | 561               | 1                                   | 1                                  |
| 1 or more                                                          | 451                            | 36                                               | 487               | 0.58 (0.35-0.99)**                  | 0.51 (0.29-0.89)**                 |
| <b>English is the main language spoken at home</b>                 |                                |                                                  |                   |                                     |                                    |
| Yes                                                                | 890                            | 50                                               | 940               | 2.02 (1.02-4.01)**                  | 1.9 (0.92-3.72)                    |
| No                                                                 | 97                             | 11                                               | 108               | 1                                   | 1                                  |
| <b>Highest level of educational attainment</b>                     |                                |                                                  |                   |                                     |                                    |
| High school, certificate, or diploma                               | 180                            | 20                                               | 200               | 0.46 (0.26-0.80)*                   | 0.68 (0.38-1.24)                   |
| Bachelor degree or higher                                          | 807                            | 41                                               | 848               | 1                                   | 1                                  |
| <b>Index of Relative Socio-economic Advantage and Disadvantage</b> |                                |                                                  |                   |                                     |                                    |
| Quintile 1 (most disadvantaged)                                    | 119                            | 12                                               | 131               | 1                                   | -                                  |
| Quintile 2                                                         | 126                            | 14                                               | 140               | 0.91 (0.40-2.04)                    | -                                  |
| Quintile 3                                                         | 222                            | 13                                               | 235               | 1.72 (0.76-3.89)                    | -                                  |
| Quintile 4                                                         | 252                            | 10                                               | 262               | 2.54 (1.07-6.05)**                  | -                                  |
| Quintile 5 (most advantaged)                                       | 268                            | 12                                               | 280               | 2.25 (0.98-5.16)                    | -                                  |

gNBS: Genomic newborn screening

\*p<0.01, \*\*p<0.05

<sup>a</sup> This group includes participants who did not complete the study enrolment process, declined gNBS in the Genetics Adviser platform, initially consented to gNBS but withdrew consent before testing, and four participants who consented to gNBS but did not proceed with testing for other reasons (one fetal death in utero, three declined sample recollection).
